# Supplementary material for: Animal sources for zoonotic transmission of psittacosis: a systematic review
Source: BMC Infect Dis. 2020 Mar 4;20:192. doi: 10.1186/s12879-020-4918-y (PMC7057575; doi:10.1186/s12879-020-4918-y)
Supplement: Supplementary file 2 — Additional file 2. Strength of evidence tool. [file 12879_2020_4918_MOESM2_ESM.xlsx]

## Sheet: SI Strength of evidence tool
		score if yes
		Default value	Set manually
	Antibodies positive test human	1	1
	Antigen positive test human	2	2
	Genotyping human	2	2
	Antibodies positive test animal	1	1
	Antigen positive test animal	2	2
	Genotyping animal	2	2
	Contact with animal	1	1
	Contact with sick animal	2	2
	Environmental sample positive	2	2
	Genotyping of environmental sample	2	2
	Epidemiological evidence	4	4
	Genotypical match	8	8
	No genotypical match	*0	*0
	Number of human cases	2	2
	Password to unprotect the sheet: psit
	(in Taskbar under Review - Unprotect Sheet)
	Calculations
	Reference, year	Arenas-Valls et al., 2017	Abadia, 2006	Abadia, 2006	Abadia, 2006	Arraiz et al., 2012	Belchior, 2010	Belchior et al., 2011	Berk et al., 2008	Bourne et al., 2003	Branley et al., 2008	Branley et al., 2014	Cadario et al., 2017	Cadario et al., 2017	Cadario et al., 2017	Cadario et al., 2017	Cadario et al., 2017	Carlier et al., 2014	Chan et al., 2017	Chau et al., 2015	Chau et al., 2015	Chau et al., 2015	Chau et al., 2015	Cheng et al., 2013	Ciftci et al., 2008	Clarence et al., 2016	De Boeck et al., 2016	De Schrijver et al., 2016	Dickx et al., 2010 [34]	Dickx et al., 2010 [35]	Dickx et al., 2010 [35]	Dickx et al., 2011 [36]	Dickx et al., 2011 [36]	Dickx et al., 2011 [36]	Dovc et al., 2005	Dovc et al., 2007	Elliot et al., 2001	Espinosa de los Monteros, 2005	Fenga, 2007	Fenga, 2007	Fenga, 2007	Fenga, 2007	Ferreira, 2015	Ferreira, 2017	Ferreri, 2007	Fraeyman, 2010	Fraeyman, 2010	Fraeyman, 2010	Frutos et al., 2012
	Animal species	psittaciformes	ducks	chickens	turkeys	columbiformes	ducks	unspecified birds	passeriformes	psittaciformes	psittaciformes	unspecified birds	chickens	psittaciformes	psittaciformes	columbiformes	psittaciformes	ducks	horse	psittaciformes	chickens	geese	chickens	psittaciformes	psittaciformes	columbiformes	psittaciformes	psittaciformes	columbiformes	chickens	turkeys	chickens	guinea fowl	turkeys	psittaciformes	psittaciformes	unspecified birds	psittaciformes	cattle	pigs	goats	sheep	psittaciformes	psittaciformes	passeriformes	columbiformes	columbiformes	columbiformes	psittaciformes
	Ab positive test human	yes	yes	yes	yes	NA	yes	yes	yes	yes	yes	yes	NA	NA	NA	NA	NA	yes	yes	yes	yes	yes	yes	yes	yes	NA	yes	yes	NA	yes	yes	NA	NA	NA	yes	yes	yes	yes	yes	yes	yes	yes	yes	yes	NA	no	no	no	NA
	Ag positive test human	yes	NA	NA	NA	yes	yes	yes	yes	NA	yes	yes	yes	yes	yes	yes	yes	yes	NA	yes	yes	yes	yes	NA	NA	yes	yes	NA	yes	yes	yes	yes	yes	yes	NA	NA	NA	yes	NA	NA	NA	NA	NA	NA	yes	yes	yes	yes	yes
	Genotyping human	no	NA	NA	NA	yes	yes	no	no	NA	no	no	yes	yes	yes	yes	yes	yes	NA	no	no	no	no	NA	NA	no	yes	NA	yes	yes	yes	yes	yes	yes	NA	NA	NA	no	NA	NA	NA	NA	NA	NA	yes	no	no	no	yes
	Ab positive test animal	NA	NA	NA	NA	NA	NA	NA	NA	NA	NA	NA	NA	NA	NA	NA	NA	NA	yes	NA	NA	NA	NA	NA	NA	NA	NA	NA	NA	NA	NA	NA	NA	NA	yes	no	NA	yes	NA	NA	NA	NA	NA	NA	NA	NA	NA	unknown	NA
	Ag positive test animal	NA	NA	NA	NA	yes	NA	no	yes	NA	yes	NA	NA	yes	yes	NA	NA	no	yes	NA	NA	NA	NA	NA	NA	NA	NA	yes	no	yes	yes	NA	NA	NA	NA	yes	NA	yes	NA	NA	NA	NA	yes	yes	yes	NA	NA	unknown	NA
	Genotyping animal	NA	NA	NA	NA	yes	NA	NA	no	NA	yes	NA	NA	yes	yes	NA	NA	NA	yes	NA	NA	NA	NA	NA	NA	NA	NA	no	no	yes	yes	no	no	no	NA	no	NA	no	NA	NA	NA	NA	no	no	yes	NA	NA	no	NA
	Contact with animal	yes	yes	yes	yes	yes	yes	yes	yes	yes	yes	yes	yes	yes	yes	yes	yes	yes	yes	yes	yes	yes	yes	yes	yes	yes	yes	yes	yes	yes	yes	yes	yes	yes	yes	yes	yes	yes	yes	yes	yes	yes	yes	yes	yes	yes	yes	yes	yes
	Contact with sick animal	yes	no	no	no	unknown	no	no	unknown	no	yes	unknown	unknown	unknown	unknown	unknown	unknown	yes	yes	no	no	no	no	yes	unknown	yes	yes	yes	yes	unknown	unknown	unknown	unknown	unknown	unknown	yes	unknown	unknown	unknown	unknown	unknown	unknown	yes	yes	no	unknown	unknown	unknown	unknown
	Environmental sample positive	NA	NA	NA	NA	NA	NA	yes	NA	NA	NA	NA	NA	NA	NA	NA	NA	yes	NA	NA	NA	NA	NA	NA	NA	NA	yes	yes	yes	yes	yes	yes	yes	yes	NA	NA	NA	NA	NA	NA	NA	NA	NA	NA	NA	NA	NA	NA	NA
	Genotyping of environmental sample	NA	NA	NA	NA	NA	NA	no	NA	NA	NA	NA	NA	NA	NA	NA	NA	no	NA	NA	NA	NA	NA	NA	NA	NA	yes	no	yes	no	no	yes	yes	yes	NA	NA	NA	NA	NA	NA	NA	NA	NA	NA	NA	NA	NA	NA	NA
	Epidemiological evidence	no	yes	no	no	no	yes	no	no	no	no	no	no	no	no	no	no	no	yes	no	no	no	no	no	no	no	no	no	no	no	no	no	no	no	no	no	no	no	yes	yes	yes	yes	no	no	no	no	no	no	no
	Genotypical match	NA	NA	NA	NA	yes	NA	NA	NA	NA	NA	NA	NA	yes	yes	NA	NA	NA	NA	NA	NA	NA	NA	NA	NA	NA	yes	NA	yes	unknown	yes	yes	yes	yes	NA	NA	NA	NA	NA	NA	NA	NA	NA	NA	yes	NA	NA	NA	NA
	Number of human cases	4	71	71	71	8	4	4	12	1	3	48	1	1	1	1	1	1	3	1	1	1	1	1	2	1	3	4	4	43	33	4	4	4	1	1	1	3	28	28	28	28	3	1	1	1	1	1	6
	Strength of evidence	8	8	4	4	19	12	8	8	2	12	6	5	17	17	5	5	10	15	4	4	4	4	4	2	5	22	10	19	14	22	19	19	19	3	6	2	9	8	8	8	8	8	6	17	3	3	3	7
	Ab positive test human	1	1	1	1	0	1	1	1	1	1	1	0	0	0	0	0	1	1	1	1	1	1	1	1	0	1	1	0	1	1	0	0	0	1	1	1	1	1	1	1	1	1	1	0	0	0	0	0
	Ag positive test human	2	0	0	0	2	2	2	2	0	2	2	2	2	2	2	2	2	0	2	2	2	2	0	0	2	2	0	2	2	2	2	2	2	0	0	0	2	0	0	0	0	0	0	2	2	2	2	2
	Genotyping human	0	0	0	0	2	2	0	0	0	0	0	2	2	2	2	2	2	0	0	0	0	0	0	0	0	2	0	2	2	2	2	2	2	0	0	0	0	0	0	0	0	0	0	2	0	0	0	2
	Ab positive test animal	0	0	0	0	0	0	0	0	0	0	0	0	0	0	0	0	0	1	0	0	0	0	0	0	0	0	0	0	0	0	0	0	0	1	0	0	1	0	0	0	0	0	0	0	0	0	0	0
	Ag positive test animal	0	0	0	0	2	0	0	2	0	2	0	0	2	2	0	0	0	2	0	0	0	0	0	0	0	0	2	0	2	2	0	0	0	0	2	0	2	0	0	0	0	2	2	2	0	0	0	0
	Genotyping animal	0	0	0	0	2	0	0	0	0	2	0	0	2	2	0	0	0	2	0	0	0	0	0	0	0	0	0	0	2	2	0	0	0	0	0	0	0	0	0	0	0	0	0	2	0	0	0	0
	Contact with animal	1	1	1	1	1	1	1	1	1	1	1	1	1	1	1	1	1	1	1	1	1	1	1	1	1	1	1	1	1	1	1	1	1	1	1	1	1	1	1	1	1	1	1	1	1	1	1	1
	Contact with sick animal	2	0	0	0	0	0	0	0	0	2	0	0	0	0	0	0	2	2	0	0	0	0	2	0	2	2	2	0	0	0	0	0	0	0	2	0	0	0	0	0	0	2	2	0	0	0	0	0
	Environmental sample positive	0	0	0	0	0	0	2	0	0	0	0	0	0	0	0	0	2	0	0	0	0	0	0	0	0	2	2	2	2	2	2	2	2	0	0	0	0	0	0	0	0	0	0	0	0	0	0	0
	Genotyping of environmental sample	0	0	0	0	0	0	0	0	0	0	0	0	0	0	0	0	0	0	0	0	0	0	0	0	0	2	0	2	0	0	2	2	2	0	0	0	0	0	0	0	0	0	0	0	0	0	0	0
	Epidemiological evidence	0	4	0	0	0	4	0	0	0	0	0	0	0	0	0	0	0	4	0	0	0	0	0	0	0	0	0	0	0	0	0	0	0	0	0	0	0	4	4	4	4	0	0	0	0	0	0	0
	Genotypical match	0	0	0	0	8	0	0	0	0	0	0	0	8	8	0	0	0	0	0	0	0	0	0	0	0	8	0	8	0	8	8	8	8	0	0	0	0	0	0	0	0	0	0	8	0	0	0	0
	No genotypical match	0	0	0	0	0	0	0	0	0	0	0	0	0	0	0	0	0	0	0	0	0	0	0	0	0	0	0	0	0	0	0	0	0	0	0	0	0	0	0	0	0	0	0	0	0	0	0	0
	Number of human cases	2	2	2	2	2	2	2	2	0	2	2	0	0	0	0	0	0	2	0	0	0	0	0	0	0	2	2	2	2	2	2	2	2	0	0	0	2	2	2	2	2	2	0	0	0	0	0	2
	https://support.office.com/en-us/article/create-a-box-plot-10204530-8cdf-40fe-a711-2eb9785e510f
			Psittaciformes	Passeriformes	Columbiformes	Chickens	Ducks	Turkeys	Other poultry*	Unspecified poultry	Other birds**	Unspecified birds	Mammals***
	Animal species	Strength of evidence	Psittaciformes	Passeriformes	Columbiformes	Chickens	Ducks	Turkeys	Other poultry (geese, guinea fowl, pheasants, peacock)	Unspecified poultry	Other birds (strigiformes, musophagiformes)	Unspecified birds	Mammals (horse, cattle, pigs, goats, sheep, fox, dogs)
	psittaciformes	8	8
	ducks	8					8
	chickens	4				4
	turkeys	4						4
	columbiformes	19			19
	ducks	12					12
	unspecified birds	8										8
	passeriformes	8		8
	psittaciformes	2	2
	psittaciformes	12	12
	unspecified birds	6										6
	chickens	5				5
	psittaciformes	17	17
	psittaciformes	17	17
	columbiformes	5			5
	psittaciformes	5	5
	ducks	10					10
	horse	15											15
	psittaciformes	4	4
	chickens	4				4
	geese	4							4
	chickens	4				4
	psittaciformes	4	4
	psittaciformes	2	2
	columbiformes	5			5
	psittaciformes	22	22
	psittaciformes	10	10
	columbiformes	19			19
	chickens	14				14
	turkeys	22						22
	chickens	19				19
	guinea fowl	19							19
	turkeys	19						19
	psittaciformes	3	3
	psittaciformes	6	6
	unspecified birds	2										2
	psittaciformes	9	9
	cattle	8											8
	pigs	8											8
	goats	8											8
	sheep	8											8
	psittaciformes	8	8
	psittaciformes	6	6
	passeriformes	17		17
	columbiformes	3			3
	columbiformes	3			3
	columbiformes	3			3
	psittaciformes	7	7
	chickens	5				5
	columbiformes	5			5
	passeriformes	5		5
	chickens	3				3
	ducks	3					3
	psittaciformes	1	1
	columbiformes	1			1
	chickens	22				22
	ducks	22					22
	geese	22							22
	psittaciformes	2	2
	psittaciformes	6	6
	turkeys	19						19
	psittaciformes	6	6
	columbiformes	2			2
	ducks	5					5
	psittaciformes	22	22
	psittaciformes	10	10
	columbiformes	10			10
	passeriformes	10		10
	turkeys	4						4
	columbiformes	4			4
	psittaciformes	20	20
	columbiformes	0			0
	psittaciformes	7	7
	passeriformes	7		7
	columbiformes	7			7
	ducks	5					5
	pheasants	5							5
	unspecified poultry	7								7
	unspecified birds	7										7
	psittaciformes	2	2
	ducks	8					8
	chickens	4				4
	turkeys	4						4
	guinea fowl	4							4
	unspecified poultry	8								8
	psittaciformes	6	6
	passeriformes	6		6
	columbiformes	6			6
	chickens	6				6
	psittaciformes	2	2
	columbiformes	2			2
	psittaciformes	6	6
	columbiformes	21			21
	passeriformes	19		19
	strigiformes	21									21
	sheep	6											6
	psittaciformes	5	5
	chickens	21				21
	ducks	20					20
	chickens	20				20
	ducks	20					20
	columbiformes	21			21
	ducks	8					8
	columbiformes	8			8
	unspecified birds	12										12
	psittaciformes	5	5
	psittaciformes	5	5
	fox	5											5
	unspecified poultry	4								4
	unspecified poultry	4								4
	unspecified birds	11										11
	psittaciformes	5	5
	chickens	5				5
	psittaciformes	2	2
	psittaciformes	4	4
	musophagiformes	7									7
	columbiformes	7			7
	chickens	5				5
	unspecified birds	8										8
	psittaciformes	6	6
	unspecified birds	4										4
	unspecified birds	6										6
	columbiformes	3			3
	unspecified birds	3										3
	dogs	10											10
	unspecified birds	8										8
	ducks	11					11
	turkeys	19						19
	psittaciformes	17	17
	psittaciformes	9	9
	turkeys	25						25
	ducks	8					8
	psittaciformes	2	2
	psittaciformes	10	10
	ducks	10					10
	peacock	23							23
			Psittaciformes	Passeriformes	Columbiformes	Chickens	Ducks	Turkeys	Other poultry (geese, guinea fowl, pheasants, peacock)	Unspecified poultry	Other birds (strigiformes, musophagiformes)	Unspecified birds	Mammals (horse, cattle, pigs, goats, sheep, fox, dogs)
		count	40	7	21	15	14	8	6	4	2	11	8
		mean	7.55	10.2857	7.33333	9.4	10.7143	14.5	12.8333	5.75	14	6.81818	8.5
		standard error	0.895108	2.08982	1.47088	1.90938	1.58436	3.15663	3.84202	1.03078	7	0.932428	1.06904
		minimum	1	5	0	3	3	4	4	4	7	2	5
		Q1	4	6.5	3	4	8	4	4.25	4	10.5	5	7.5
		median	6	8	5	5	9	19	12	5.5	14	7	8
		Q3	9.25	13.5	8	16.5	11.75	19.75	21.25	7.25	17.5	8	8.5
		Maximum	22	19	21	22	22	25	23	8	21	12	15
		minimum	1	5	0	3	3	4	4	4	7	2	5
		Q1 and minimum	3	1.5	3	1	5	0	0.25	0	3.5	3	2.5
		median and Q1	2	1.5	2	1	1	15	7.75	1.5	3.5	2	0.5
		Q3 and median	3.25	5.5	3	11.5	2.75	0.75	9.25	1.75	3.5	1	0.5
		maximum and Q3	12.75	5.5	13	5.5	10.25	5.25	1.75	0.75	3.5	4	6.5
[truncated: 88 more columns]
